# Supplementary material for: Marigold-like tyrosinase-embedded nanostructures—a nano-in-micro system
Source: Royal Society of Chemistry journal article supplement (doi:10.1039/d0dt02358b), 2020-01-01
Supplement: d0dt02358b1.pdf [file d0dt02358b1.pdf]

## Supplementary document

### Effect of Zinc ions instead of copper ions in nanoflowers formation

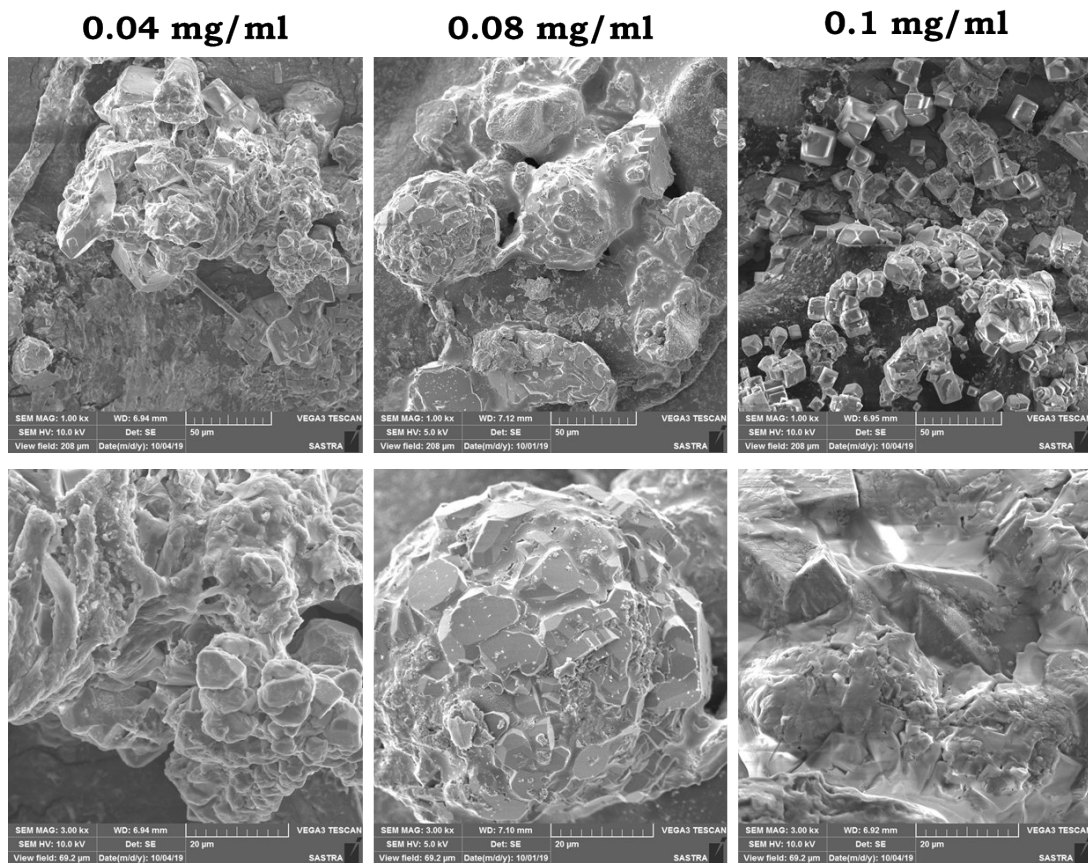

**Figure S1.** Scanning electron micrographs of tyrosinase enzyme incubated with zinc chloride solution at various enzyme concentrations shows absence of defined microstructures (magnifications at 1000X and 3000X)

### Enzyme kinetics:

To estimate the enzyme kinetics, oxidation of L-DOPA to Dopachrome was observed as one of the properties of tyrosinase enzyme is. Kinetic parameters were studied using various concentrations of L-DOPA (1- 5 mM) to react with free enzyme and NF (equivalent to 10  $\mu\text{g/mL}$ ) in phosphate buffer solution (pH 7). Samples were collected at regular intervals of time (0-5

minutes) and absorbance was recorded for dopachrome produced at 480 nm. Lineweaver-Burk graph was plotted for absorbance versus time and corresponding  $K_m$  and  $V_{max}$  values were calculated against standard graph for known concentrations of Dopachrome as a calibration graph.

Initially, the rate of reaction was calculated from polynomial equation in absorbance vs time plot for individual substrate concentrations. The  $K_m$  and  $V_{max}$  values were obtained from LB plot where the linear equation ( $y=ax+b$ ) demonstrates intercepts  $a$  &  $b$  corresponding to  $K_m/V_{max}$  and  $1/V_{max}$  respectively in the equation given below.

Enzyme kinetics was estimated using Lineweaver Burk Plot (Figure S1) with below mentioned equation:

$$\frac{1}{V_o} = \frac{K_m}{V_{max}} * \frac{1}{[S]} + \frac{1}{V_{max}}$$

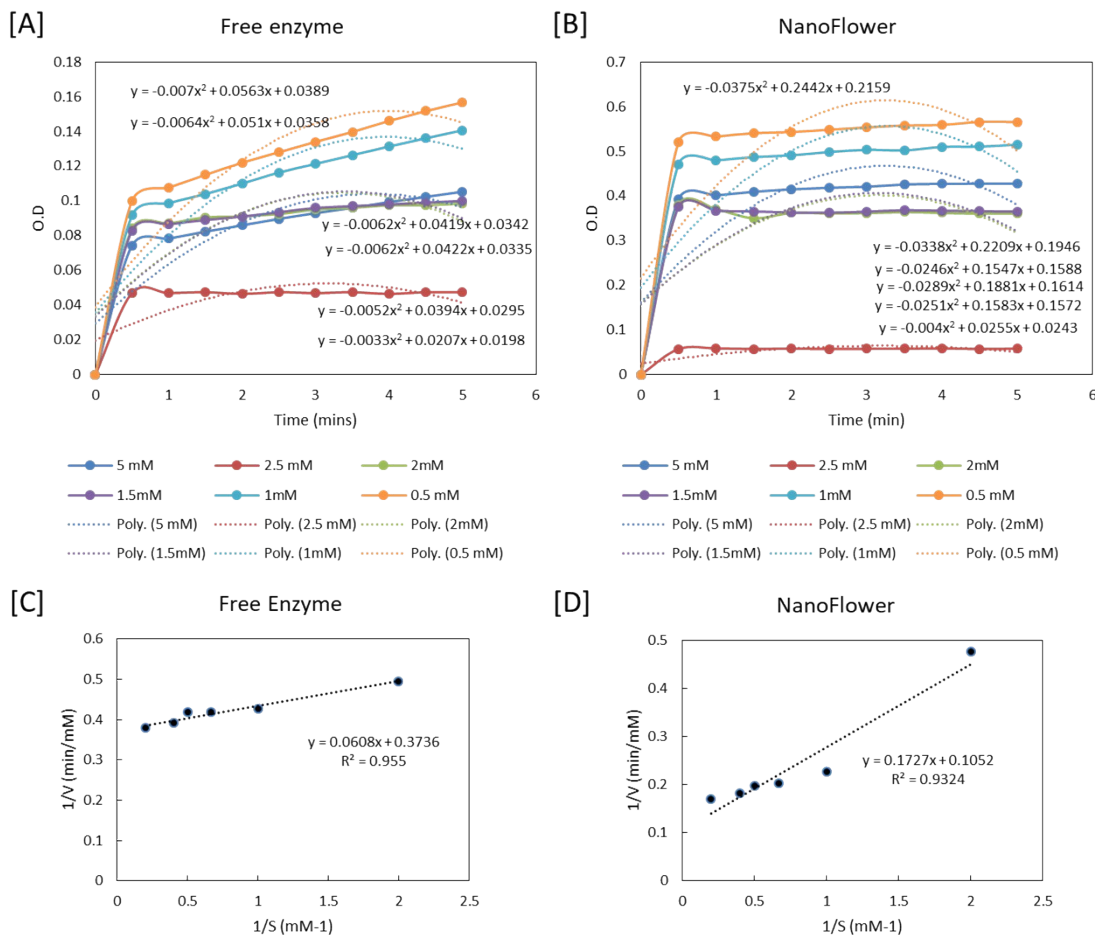

Figure S2. [A &B] Absorbance vs Time plot; [C & D] LB plot for Free enzyme and nanoflowers
